# Supplementary material for: Effect of incubation temperature and substrate moisture on embryonic development, hatchling phenotypes and post-hatching growth in the Reeves’ Turtle, Mauremys reevesii
Source: PeerJ. 2021 Feb 12;9:e10553. doi: 10.7717/peerj.10553 (PMC7883692; doi:10.7717/peerj.10553)
Supplement: Supplemental Information 1 [file peerj-09-10553-s001.xlsx]

## Sheet: Sheet1
Initial egg mass (g)	Incubation temperature (℃)	Substrate moisture levels	Hatching success	Hatchling malformations	Survival rates of hatchlings at 12 months of age	Body mass (g)	Carapace length (mm)	Carapace width (mm)	Body height (mm)	Incubation duration (days)	Body mass of hatchlings (g) at 1 month after hatching	Body mass of hatchlings (g) at 2 months after hatching	Body mass of hatchlings (g) at 3 months after hatching	Body mass of hatchlings (g) at 12 months after hatching	The daily weight gain (g/day) at 1 month after hatching	The daily weight gain (g/day) at 2 months after hatching	The daily weight gain (g/day) at 3 months after hatching	The daily weight gain (g/day) at 12 months after hatching
4.6	23	low	hatched	malformation	died	2.4	21	15.9	12.46	115
4.8	23	low	hatched	normal	died	2.9	21.44	16.26	13.2	115
5.5	23	low	hatched	malformation	died	3	22.34	17.64	12.32	115
5.4	23	low	hatched	normal	died	3	22.54	17.28	12.6	115
5	23	low	hatched	normal	survive	3.2	22.64	16.56	12.64	115	3.7	5.9	8.5	56.6	0.0178571	0.0733333	0.092857	0.221659
6.7	23	low	hatched	normal	died	3.3	23.46	17.64	13	115
5.9	23	low	hatched	malformation	died	3.2	23.54	16.9	13.36	117
6	23	low	hatched	normal	died	3.6	23.56	17.98	13.96	117
7	23	low	hatched	normal	died	4	23.74	18.3	13.1	117
6.1	23	low	hatched	normal	survive	4.1	24.12	19.38	14.66	119	4.3	5.6	7	25.5	0.00625	0.0433333	0.05	0.085253
6.4	23	low	hatched	normal	survive	3.8	24.18	17.82	14.52	121	4.5	7	9.3	45.6	0.0205882	0.0833333	0.082143	0.167281
6.8	23	low	hatched	normal	survive	4.1	24.2	18	14.48	121	3.9	5.3	7.6	54.9	-0.00714286	0.0466667	0.082143	0.217972
6.6	23	low	hatched	normal	survive	4.2	24.5	18.48	13.58	121	4.8	6.4	9.3	53.2	0.01875	0.0533333	0.103571	0.202304
6.7	23	low	hatched	normal	died	3.8	24.62	17.9	13.56	117
5.7	23	low	died
6.5	23	low	died
4.7	23	low	died
4.7	23	low	died
6.1	23	low	died
5.8	23	medium	hatched	normal	survive	3.8	24.12	19.82	14.1	107	4.7	6.8	10.3	42.1	0.03	0.07	0.125	0.146544
6	23	medium	hatched	normal	survive	3.2	22.78	18.96	13	109	3.5	5.3	7.2	38.7	0.0075	0.06	0.067857	0.145161
5.2	23	medium	hatched	malformation	died	3.2	22.1	17.48	12.68	110
5.8	23	medium	hatched	normal	survive	3.4	22.68	19	13.2	110	3.9	5.1	6.2	52.6	0.0128205	0.04	0.039286	0.213825
6.1	23	medium	hatched	normal	died	4.5	24	21	14.56	110
6.5	23	medium	hatched	normal	died	4	25	20.82	13.2	111
4.9	23	medium	hatched	malformation	survive	3.1	22.74	17.82	12.68	113	3.1	4.2	5.7	31	0	0.0366667	0.053571	0.11659
6.9	23	medium	hatched	normal	survive	4.3	24.38	20.78	14.72	113	4.7	6.7	9.1	41.5	0.0111111	0.0666667	0.085714	0.149309
6.2	23	medium	hatched	normal	died	4.4	23.54	20.28	14.36	114
5.8	23	medium	hatched	normal	survive	3.3	23.56	19.16	12.16	116	3.7	6.1	9.3	40.2	0.0121212	0.08	0.114286	0.142396
5.5	23	medium	hatched	normal	survive	3.3	22.28	19.08	14.14	116	3.4	4.4	5.7	29.8	0.0030303	0.0333333	0.046429	0.11106
6.8	23	medium	hatched	normal	survive	4.1	23.7	19.76	13.46	117	5	8.5	13.8	66.9	0.028125	0.116667	0.189286	0.2447
6.3	23	medium	hatched	malformation	died	3.7	23.44	19.42	14	119
5.7	23	medium	hatched	normal	survive	3.8	22.4	17.36	12.88	119	4.4	6.9	10.3	52.2	0.0142857	0.0833333	0.121429	0.19318
6.7	23	medium	hatched	normal	survive	3.8	23.92	19.64	13.12	119	3.1	3.6	4.6	35.6	-0.0233333	0.0166667	0.035714	0.142857
5.6	23	medium	hatched	normal	survive	3.5	23.54	18.5	14	113	4.2	6	8.8	39	0.0194444	0.06	0.1	0.139171
5.6	23	medium	hatched	malformation	died	2.8	20.3	16.4	12.5	119
7	23	medium	hatched	normal	survive	4.9	26.16	22.7	15.34	112	5.8	7.6	9.6	40	0.0243243	0.06	0.071429	0.140092
7.4	23	medium	died
6.5	23	medium	died
5	23	medium	died
6.2	23	medium	died
4.9	23	high	hatched	normal	survive	2.9	21	18.16	12.34	109	3.3	4.7	7.1	39	0.01	0.0466667	0.085714	0.147005
6.1	23	high	hatched	normal	survive	3.4	21.68	18.34	13.24	110	4.2	5.3	6.5	29.9	0.0205128	0.0366667	0.042857	0.107834
6.4	23	high	hatched	normal	survive	3.7	23.56	18.54	13.8	110	5.2	7.2	10	45.6	0.0384615	0.0666667	0.1	0.164055
6.2	23	high	hatched	malformation	died	4.2	23.88	20.2	14.12	111
5.1	23	high	hatched	normal	died	4.3	24.72	20.18	14	113
5.5	23	high	hatched	normal	died	3.3	22	20.4	14.28	114
6.7	23	high	hatched	normal	survive	4	23.96	19.64	14.7	114	5	8	12	64.1	0.0285714	0.1	0.142857	0.240092
6.5	23	high	hatched	malformation	survive	4	23.92	19.86	14.2	114	5.1	7.5	9.2	54.2	0.0314286	0.08	0.060714	0.207373
5.7	23	high	hatched	malformation	died	3.7	22.86	18.78	12.54	115
6.4	23	high	hatched	normal	survive	4.3	25	21.56	14.2	117	4.5	5.2	6.8	35.4	0.00625	0.0233333	0.057143	0.131797
5.4	23	high	hatched	normal	survive	3.6	23.42	20.2	14.22	117	4.5	4.9	6	35.2	0.028125	0.0133333	0.039286	0.134562
6.6	23	high	hatched	normal	survive	4.6	24.56	20.8	15	117	5.3	7.9	11.3	50	0.021875	0.0866667	0.121429	0.178341
5.8	23	high	hatched	normal	died	3.8	24.32	18.94	13.92	117
6	23	high	died
6.6	23	high	died
6	23	high	died
6.7	23	high	died
4.1	23	high	died
4.2	26	low	hatched	normal	survive	2.4	20.68	16.18	11.88	91	2.2	3.5	4.5	35.7	-0.00833333	0.0288889	0.058824	0.126316
4.8	26	low	hatched	normal	survive	3.2	21.98	18.64	12.88	82	3.5	6.2	8.1	59.3	0.00909091	0.06	0.111765	0.207287
5.5	26	low	hatched	normal	survive	3.2	22	18.64	12.62	82	3.6	6.3	7.9	40.3	0.0121212	0.06	0.094118	0.131174
6.3	26	low	hatched	normal	survive	3.3	22.9	18.7	13.14	85	4	6.7	8.2	37.8	0.0233333	0.06	0.088235	0.119838
5.2	26	low	hatched	normal	survive	3.5	23.28	20.18	13.64	82	4.2	6.1	7	32.6	0.0241379	0.0422222	0.052941	0.103644
5.1	26	low	hatched	normal	survive	3.5	23.52	18.5	13.78	86	4.1	7	8.9	50.1	0.0206897	0.0644444	0.111765	0.166802
5.7	26	low	hatched	malformation	died	3.5	22.86	19.16	13.58	86
5	26	low	hatched	normal	survive	3.6	23.52	18.74	13.34	83	3.9	6.4	7.7	33.5	0.009375	0.0555556	0.076471	0.104453
6.5	26	low	hatched	normal	survive	3.8	25.34	19.4	12.94	92	3.7	5	6.5	39.7	-0.00434783	0.0288889	0.088235	0.134413
6.2	26	low	hatched	normal	survive	3.9	24	19.46	13.86	89	4	5.7	6.9	33.5	0.00384615	0.0377778	0.070588	0.107692
6.3	26	low	hatched	malformation	survive	4	25.32	20.32	13.72	84	4.7	7	8.4	38.4	0.0225806	0.0511111	0.082353	0.121457
6.5	26	low	hatched	normal	survive	4	25	20.38	14.76	84	4.6	6.5	7.9	49.9	0.0230769	0.0422222	0.082353	0.17004
6.8	26	low	hatched	normal	survive	4	24.8	19.96	14	89	4.5	6.5	8.3	50.9	0.0192308	0.0444444	0.105882	0.17247
7.2	26	low	hatched	normal	survive	4	25.38	19.28	13.28	89	5	8.6	10.8	47.3	0.0322581	0.08	0.129412	0.147773
6.5	26	low	hatched	normal	survive	4.1	25.3	20.28	14.12	90	4.7	8.3	10.5	58.9	0.024	0.08	0.129412	0.195951
6.6	26	low	hatched	normal	survive	4.2	25.86	20	14.42	84	5.3	8.3	10.3	56.8	0.0354839	0.0666667	0.117647	0.188259
6.6	26	low	hatched	normal	survive	4.3	25.5	21.12	14	86	4.6	6.9	8.3	50	0.0115385	0.0511111	0.082353	0.168826
7.5	26	low	hatched	normal	survive	4.3	25.46	20.9	14	86	4.9	7.2	8.7	49	0.0206897	0.0511111	0.088235	0.163158
6.7	26	low	hatched	normal	survive	4.3	25.4	20.16	14.1	89	5	8.5	10.6	54.4	0.0241379	0.0777778	0.123529	0.177328
5	26	medium	hatched	normal	survive	3	22.16	18.76	13.22	79	3.5	5.6	6.9	44.1	0.0138889	0.0466667	0.076471	0.150607
6	26	medium	hatched	normal	survive	3.6	24.06	18.64	13.48	80	4.4	7	8.4	55.9	0.0228571	0.0577778	0.082353	0.192308
4.9	26	medium	hatched	malformation	survive	3	22.48	18.66	12.92	82	3	5	5.9	27.8	0	0.0444444	0.052941	0.088664
6	26	medium	hatched	normal	survive	3.5	24.24	18.28	13.24	82	3.4	5	5.7	28.3	-0.0030303	0.0355556	0.041176	0.091498
6.4	26	medium	hatched	normal	survive	3.8	23.72	20.1	13.66	83	4.3	5.9	6.3	29.6	0.015625	0.0355556	0.023529	0.094332
4.8	26	medium	hatched	normal	survive	3.2	23.2	19	13.12	84	4	7.5	9.8	52.9	0.0258065	0.0777778	0.135294	0.174494
5.4	26	medium	hatched	malformation	survive	3.2	23.86	18.6	13.52	84	4	5.2	5.8	36.8	0.0258065	0.0266667	0.035294	0.125506
5.9	26	medium	hatched	normal	survive	3.8	24.66	19.56	13.98	84	4	6.4	7.5	42.5	0.0133333	0.0533333	0.064706	0.1417
4.4	26	medium	hatched	normal	survive	2.7	21.18	17.82	11.88	84	4.4	7	8.9	46.4	0.0172414	0.0577778	0.111765	0.151822
5.8	26	medium	hatched	malformation	survive	3.6	24.28	19.36	12.74	85	3.1	4.8	5.7	30.4	-0.00344828	0.0377778	0.052941	0.1
6.5	26	medium	hatched	normal	survive	3.9	24.12	18.94	13.88	86	4.2	7.4	9.9	62.3	0.0111111	0.0711111	0.147059	0.212146
5.4	26	medium	hatched	normal	survive	3.2	23	18.62	12.52	86	3.3	6.1	7.9	49.8	0.0193548	0.0622222	0.105882	0.169636
5.1	26	medium	hatched	normal	survive	3	22.3	17.66	12.84	87	3.1	4.6	5.2	24.2	0.00357143	0.0333333	0.035294	0.076923
5.9	26	medium	hatched	malformation	died	3.9	24.2	20.6	13.88	88
4.3	26	medium	died
5.8	26	medium	died
5.3	26	high	hatched	normal	survive	3.9	23.48	20.48	14	80	5	6.7	7.5	37.3	0.0314286	0.0377778	0.047059	0.120648
4.1	26	high	hatched	normal	survive	2.7	21.22	16.64	13.26	80	3.3	6	7.9	50.5	0.0171429	0.06	0.111765	0.17247
6	26	high	hatched	normal	survive	3.3	22.34	17.34	12.84	80	3.8	5.4	6.3	29.9	0.0142857	0.0355556	0.052941	0.095547
5.7	26	high	hatched	normal	survive	3.7	24.46	20.3	13.24	83	4	4.8	5.1	19.8	0.009375	0.0177778	0.017647	0.059514
6.2	26	high	hatched	normal	survive	3.6	24.08	19.4	13.46	83	4.5	6.8	8.6	55.5	0.028125	0.0511111	0.105882	0.189879
5	26	high	hatched	malformation	survive	2.7	21.18	18.6	12.1	83	3	4.5	5.3	23.3	0.009375	0.0333333	0.047059	0.072874
6.8	26	high	hatched	normal	survive	3.9	24	20.12	13.68	84	4.8	7.8	9.5	50.8	0.0290323	0.0666667	0.1	0.167206
5.3	26	high	hatched	normal	survive	3	23.14	18.92	12.76	84	3.7	6.5	8.2	42.8	0.0225806	0.0622222	0.1	0.140081
7.8	26	high	hatched	normal	survive	4.8	26.4	22	14.44	84	5.5	9.2	11.1	52.7	0.0225806	0.0822222	0.111765	0.168421
6.9	26	high	hatched	normal	survive	4	24.8	19.18	13.16	85	4.3	7.6	10.2	50.5	0.01	0.0733333	0.152941	0.163158
5.9	26	high	hatched	malformation	died	3.6	23.34	19.46	13.2	85
7	26	high	hatched	normal	survive	4.2	24.22	19.88	13.76	86	4.4	7.1	8.7	52.6	0.00689655	0.06	0.094118	0.177733
6.1	26	high	hatched	normal	survive	3.7	24.86	19.9	13.34	86	4.3	6.8	8.1	40.1	0.0206897	0.0555556	0.076471	0.129555
6.3	26	high	hatched	normal	died	3.7	24.08	19	13.1	86
6.6	26	high	hatched	malformation	survive	3.8	23.62	20.68	13.66	86	4.2	6.8	8.2	43.8	0.0137931	0.0577778	0.082353	0.14413
5.9	26	high	hatched	normal	survive	3.8	23.44	19.76	13.14	86	4	5.2	5.9	35.7	0.00689655	0.0266667	0.041176	0.120648
6.6	26	high	hatched	normal	survive	3.9	24.52	21	13.36	86	4.6	7	8.9	55.3	0.0241379	0.0533333	0.111765	0.187854
7	26	high	hatched	normal	survive	4	24.72	20.86	13.86	87	4.8	8.1	9.9	52.3	0.0285714	0.0733333	0.105882	0.17166
7	26	high	hatched	normal	survive	4.3	24.48	19.74	14.24	87	4.9	6.2	6.6	25.9	0.0214286	0.0288889	0.023529	0.078138
5	26	high	hatched	normal	survive	3	22.36	18.14	12.66	88	3.1	5.1	6.5	36.8	0.0037037	0.0444444	0.082353	0.122672
6.8	26	high	hatched	normal	survive	3.6	23.5	19.84	12.76	88	3.6	5.3	6	32.2	0	0.0377778	0.041176	0.106073
5.2	26	high	hatched	normal	survive	3	22.66	18.1	12.6	88	3.7	5.9	7.3	39.3	0.0259259	0.0488889	0.082353	0.129555
5.9	26	high	died
5.9	29	low	hatched	normal	survive	3.2	22.62	18.84	12.72	70	3.9	5.3	6.3	43.2	0.02	0.0538462	0.03125	0.134182
6.6	29	low	hatched	normal	survive	3.9	26.92	20.16	13.78	70	6.1	7.7	9.3	53.4	0.0628571	0.0615385	0.05	0.160364
7.2	29	low	hatched	malformation	survive	3.7	24.3	19.28	13.48	70	4.8	6.2	7.5	36	0.0314286	0.0538462	0.040625	0.103636
5.6	29	low	hatched	normal	survive	3.3	22.5	18.66	12.72	70	3.2	3.1	3.6	34.6	-0.0047619	-0.00384615	0.015625	0.112727
7.1	29	low	hatched	normal	survive	4	24.62	20.58	13.22	71	4	5.3	6.7	33.5	0	0.05	0.04375	0.097455
6	29	low	hatched	normal	survive	3.8	24.76	19.9	13.48	71	3.8	4.3	5.7	38.8	0	0.0192308	0.04375	0.120364
4.7	29	low	hatched	normal	survive	2.4	20.5	15.68	11.46	71	2.8	3.7	4.6	33.1	0.0117647	0.0346154	0.028125	0.103636
7.8	29	low	hatched	normal	survive	4.3	25.64	20.64	14.6	71	4.7	6.3	9.3	45.2	0.02	0.0615385	0.09375	0.130545
6.1	29	low	hatched	normal	survive	4.1	25.38	19.84	13.7	72	3.9	5.5	7.1	49.4	-0.0105263	0.0615385	0.05	0.153818
4.6	29	low	hatched	malformation	survive	2.2	20.16	16.64	12.32	72	2.2	2.3	3.3	38.2	0	0.00384615	0.03125	0.126909
7.4	29	low	hatched	normal	survive	4.6	26.4	19.62	14.56	73	3.9	5.2	6.6	29.9	-0.0388889	0.05	0.04375	0.084727
5.6	29	low	hatched	normal	survive	2.9	20.06	18.1	12.32	74	3.3	4.9	7	52.4	0.0129032	0.0615385	0.065625	0.165091
6.6	29	low	hatched	normal	survive	2.8	22.54	17.46	12.48	74	3.7	4.5	6.3	39.6	0.0290323	0.0307692	0.05625	0.121091
5	29	low	hatched	normal	survive	3	21.74	18.74	12.28	74	2.6	3.3	4.1	26.8	-0.0235294	0.0269231	0.025	0.082545
6.4	29	low	hatched	normal	survive	3.6	23.8	19	13	75	3.7	4.8	6.5	46.2	0.00625	0.0423077	0.053125	0.144364
4.2	29	low	hatched	normal	survive	2	18.88	17.4	11.7	75	2	2.4	4.2	54.2	0	0.0153846	0.05625	0.181818
5.8	29	low	died
4.8	29	low	died
7	29	low	died
8.3	29	low	died
5.9	29	medium	hatched	malformation	survive	3.1	22.52	18.46	12.4	68	4.2	5.2	6.3	30.1	0.0297297	0.0384615	0.034375	0.086545
6.2	29	medium	hatched	normal	survive	3.4	23.34	19.68	13	68	5.3	7.8	10.6	45	0.0513514	0.0961538	0.0875	0.125091
7.5	29	medium	hatched	normal	survive	4.1	24.6	19.62	13.4	68	6.3	8.8	11.7	62.5	0.0594595	0.0961538	0.090625	0.184727
6.2	29	medium	hatched	normal	survive	3.3	24	19.44	12.94	69	4.4	5.8	7.3	35.7	0.0305556	0.0538462	0.046875	0.103273
5.7	29	medium	hatched	normal	survive	3.8	24.44	19.82	13.32	69	5.4	7	8.7	48.4	0.0444444	0.0615385	0.053125	0.144364
6.9	29	medium	hatched	normal	survive	3.7	24.16	20.9	12.92	70	4.2	4.9	5.5	21.2	0.0142857	0.0269231	0.01875	0.057091
6.1	29	medium	hatched	normal	survive	3.3	23.14	19	12.36	70	4.5	5.5	6.5	27.8	0.0342857	0.0384615	0.03125	0.077455
5	29	medium	hatched	normal	survive	3.3	22.42	19.68	12.88	70	3.4	4.4	6	38.2	0.00588235	0.0384615	0.05	0.117091
6	29	medium	hatched	normal	survive	3.8	25.32	20.36	12.92	71	5	6.7	9.5	42.4	0.0352941	0.0653846	0.0875	0.119636
5.3	29	medium	hatched	normal	survive	3	22.46	18.52	12.6	71	4.1	5.3	8	39.9	0.0323529	0.0461538	0.084375	0.116
5.4	29	medium	hatched	normal	survive	3.2	23.12	17.7	12.64	71	4	4.8	6.5	25.9	0.0235294	0.0307692	0.053125	0.070545
4.8	29	medium	hatched	normal	survive	2.4	21.18	16.66	11.4	71	2.7	2.8	3.8	29.9	0.00882353	0.00384615	0.03125	0.094909
5.9	29	medium	hatched	normal	survive	3.3	23	18.66	12.76	72	4.3	5	6.2	33.4	0.030303	0.0269231	0.0375	0.098909
6.6	29	medium	hatched	malformation	survive	3.6	24.42	18.4	13.06	73	4.6	6.2	7.9	32	0.03125	0.0615385	0.053125	0.087636
7	29	medium	hatched	normal	survive	3.9	25.06	20.08	13	73	4.5	5.7	7.4	32.1	0.01875	0.0461538	0.053125	0.089818
6.8	29	medium	hatched	normal	survive	3.9	24.16	19.18	13.86	73	5.2	7.2	9.5	52.9	0.040625	0.0769231	0.071875	0.157818
6.5	29	medium	hatched	normal	survive	3.8	24.7	19.52	13	74	4.4	5.1	5.6	37.6	0.0193548	0.0269231	0.015625	0.116364
6.8	29	medium	hatched	normal	survive	3.3	23.76	19.82	12.68	74	3.8	5.5	7.9	36.7	0.0238095	0.0653846	0.075	0.104727
6.9	29	medium	hatched	normal	survive	3.9	25	20.1	13.36	74	4.6	6.2	8.1	36.4	0.0225806	0.0615385	0.059375	0.102909
6.7	29	medium	hatched	normal	survive	4.3	25.7	20.46	13.76	74	6.2	8.8	12.2	59.9	0.0612903	0.1	0.10625	0.173455
4.6	29	medium	hatched	normal	survive	2.6	21.64	17	11.78	75	3.1	3.8	5.2	18.8	0.0166667	0.0269231	0.04375	0.049455
4.9	29	medium	hatched	normal	survive	2.6	21.9	17.14	12.28	75	2.5	3	4.5	45.4	-0.00625	0.0192308	0.046875	0.148727
5.4	29	medium	hatched	normal	survive	3.5	23	19.82	12.72	75	3.6	5	7.2	37.6	0.00625	0.0538462	0.06875	0.110545
5.4	29	medium	died
3.8	29	medium	died
6.2	29	medium	died
6.1	29	medium	died
5.8	29	high	hatched	normal	survive	3.2	22.46	20.2	13	63	4.7	7.2	11.6	61.6	0.0357143	0.0961538	0.1375	0.181818
5.7	29	high	hatched	normal	survive	3.1	23.24	19.72	12.18	63	4.8	6.8	9.4	51.1	0.0404762	0.0769231	0.08125	0.151636
6.5	29	high	hatched	malformation	died	3.1	20.72	14.96	11.82	63
5.9	29	high	hatched	normal	survive	3.5	24.56	20.04	13.1	64	5.3	6.4	8.9	35.2	0.0514286	0.0423077	0.078125	0.095636
5.5	29	high	hatched	normal	survive	3.4	23.74	18.72	13	65	5.3	7.1	9.1	41.2	0.0475	0.0692308	0.0625	0.116727
5.9	29	high	hatched	normal	survive	3.1	22.66	18.42	12.26	65	3.9	4.5	5.3	29.1	0.02	0.0230769	0.025	0.086545
6.2	29	high	hatched	normal	survive	3.3	22.68	19.32	12.68	67	3.7	4.6	6.1	40.8	0.0166667	0.0346154	0.046875	0.126182
5.4	29	high	hatched	normal	survive	3.4	23.76	19.18	12.64	67	3.9	4.8	6.6	25.5	0.0151515	0.0346154	0.05625	0.068727
5.1	29	high	hatched	normal	survive	3.3	23.3	18.68	12.7	67	3.5	4.6	5.8	29.8	0.00833333	0.0423077	0.0375	0.087273
5.4	29	high	hatched	normal	survive	3.3	22.56	18.8	13.1	67	3.5	4.6	6.6	39.2	0.00833333	0.0423077	0.0625	0.118545
6.6	29	high	hatched	normal	survive	3.6	24.42	19.22	13	68	4.1	4.7	5.8	24.9	0.0135135	0.0230769	0.034375	0.069455
5	29	high	hatched	normal	survive	2.8	21.48	17	12.12	68	4.5	5.9	8.4	48.6	0.0472222	0.0538462	0.078125	0.146182
5.7	29	high	hatched	normal	survive	3.6	23.46	18.84	13.66	68	4	5.3	7.7	50.4	0.0173913	0.05	0.075	0.155273
5.1	29	high	hatched	normal	survive	2.8	22.16	18.54	11.88	69	2.4	3.5	5	38.6	-0.0173913	0.0423077	0.046875	0.122182
5.5	29	high	hatched	normal	survive	3.5	22.74	19.58	12.4	70	4.7	6.1	8.8	38.8	0.0363636	0.0538462	0.084375	0.109091
5.4	29	high	hatched	normal	survive	3	22.82	18.96	12.1	70	3.2	4	5.7	44.2	0.00952381	0.0307692	0.053125	0.14
7.3	29	high	hatched	normal	survive	4.4	26	21.6	13.24	70	6.7	8.8	10.6	57.2	0.0657143	0.0807692	0.05625	0.169455
6.5	29	high	hatched	normal	survive	3.8	25.54	19.16	14.24	70	5.2	6.5	9	54.2	0.04	0.05	0.078125	0.164364
6.8	29	high	hatched	normal	survive	3.9	24.14	19.94	13	71	3.7	4.1	4.9	22.5	-0.00588235	0.0153846	0.025	0.064
5.1	29	high	hatched	normal	survive	3	22.5	18.46	12.52	71	4.2	5.5	7.4	40.7	0.0352941	0.05	0.059375	0.121091
7.5	29	high	hatched	normal	survive	4.8	26.88	21.66	14.48	71	5.9	7	8.1	33	0.0323529	0.0423077	0.034375	0.090545
5.5	29	high	hatched	normal	survive	3.5	23.36	18.16	12.66	72	4.2	5.6	7.7	42.5	0.0259259	0.0538462	0.065625	0.126545
5.7	29	high	hatched	normal	died	3.6	23.24	18.84	13.1	72
5.5	29	high	hatched	normal	survive	3.4	22.86	18.62	12.62	72	4.2	6	8.7	56.7	0.0333333	0.0692308	0.084375	0.174545
5.9	29	high	hatched	normal	survive	3.8	24.42	18.6	13.14	72	5.5	6.7	8.3	41	0.0515152	0.0461538	0.05	0.118909
4.8	29	high	hatched	normal	died	2.9	22	18.1	12.6	73
7.1	29	high	hatched	normal	survive	4.6	26.2	21.48	14.22	73	6.8	9.8	15.5	92.7	0.06875	0.115385	0.178125	0.280727
7.1	29	high	hatched	normal	survive	4.8	27	21.22	14	73	7.1	8.8	10.9	38.5	0.071875	0.0653846	0.065625	0.100364
6.2	29	high	hatched	normal	survive	3.2	23.44	17.6	12.66	73	3	3.9	6.7	43.2	-0.0111111	0.0346154	0.0875	0.132727
6.5	29	high	died
5	32	low	hatched	normal	survive	3.2	22.4	17.42	12.34	60	5.6	7.6	9.4	38.7	0.0533333	0.08	0.054545	0.106545
4.9	32	low	hatched	normal	survive	3	22.7	16.92	12.28	61	4.3	6.7	12.3	102.4	0.0433333	0.096	0.169697	0.327636
5.8	32	low	hatched	malformation	survive	3.3	22.56	17.44	12.58	61	4.7	6.2	7.2	45.2	0.0333333	0.06	0.030303	0.138182
4.7	32	low	hatched	normal	survive	3.1	21.7	17.78	12.56	62	4.6	5.5	6.7	38.1	0.0348837	0.036	0.036364	0.114182
4.8	32	low	hatched	normal	survive	3.9	24.26	19.24	13.36	62	4.9	5.8	6.9	30.8	0.0344828	0.036	0.033333	0.086909
5.8	32	low	hatched	normal	survive	3.3	22.1	18.14	12.86	62	4.4	6.2	8.3	42.1	0.037931	0.072	0.063636	0.122909
5.2	32	low	hatched	malformation	died	2.9	21.82	17	11.96	63
6.2	32	low	hatched	normal	survive	3.3	24.2	18.72	12.12	63	4	4.9	5.6	16.8	0.028	0.036	0.021212	0.040727
5.8	32	low	hatched	normal	survive	2.9	22.16	17.52	12	65	4.6	6.2	8.1	40	0.0425	0.064	0.057576	0.116
5.6	32	low	hatched	normal	survive	3.6	23.76	18.64	13.1	66	3.2	3	3.3	15.6	-0.016	-0.008	0.009091	0.044727
4.7	32	low	hatched	normal	survive	3.3	23.42	18.28	12.28	66	3.2	3.4	4.4	16	-0.00333333	0.008	0.030303	0.042182
5.2	32	low	hatched	normal	survive	2.6	21.12	17.7	11.92	59	4.5	6.3	7.5	55	0.0413043	0.072	0.036364	0.172727
6	32	low	hatched	normal	survive	3.2	22.78	17.78	11.48	59	4.1	5.6	7.1	34.3	0.028125	0.06	0.045455	0.098909
6.7	32	low	died
6.9	32	low	died
5.6	32	low	died
4.7	32	low	died
4.8	32	low	died
6.2	32	low	died
4.9	32	low	died
5.8	32	low	died
5.8	32	low	died
6	32	low	died
6.6	32	low	died
5.8	32	low	died
6.6	32	low	died
3.6	32	low	died
5.6	32	medium	hatched	normal	survive	3.7	24	17.76	13.56	56	5.6	7.7	9.3	52.8	0.0387755	0.084	0.048485	0.158182
6	32	medium	hatched	normal	survive	3.2	21.62	17.22	12.86	56	4.2	6.3	9.2	55.4	0.0222222	0.084	0.087879	0.168
6.2	32	medium	hatched	normal	survive	3.6	24.12	18.32	13	57	5	7	10.3	63	0.0291667	0.08	0.1	0.191636
5.1	32	medium	hatched	normal	survive	2.8	21.9	16.68	11.84	57	3.9	5.7	7.7	43	0.0323529	0.072	0.060606	0.128364
5.1	32	medium	hatched	normal	survive	3	21.58	17.74	12.36	59	3.6	4.8	6.7	41.6	0.0130435	0.048	0.057576	0.126909
4.6	32	medium	hatched	normal	survive	2.4	21.2	16.28	11	59	3.5	5.4	8.9	63.7	0.023913	0.076	0.106061	0.199273
5.1	32	medium	hatched	normal	survive	2.7	20.1	15.4	11.32	59	3.2	4.4	5.8	41.7	0.015625	0.048	0.042424	0.130545
5.9	32	medium	hatched	normal	survive	3.8	24.52	19.32	13	60	5.1	6.6	8	33.6	0.0288889	0.06	0.042424	0.093091
5.7	32	medium	hatched	normal	survive	3.2	22.42	18.08	12.74	60	4.1	5.1	6.9	37.7	0.0257143	0.04	0.054545	0.112
7.1	32	medium	hatched	normal	died	2.5	20.96	15.82	11.38	60
5.7	32	medium	hatched	normal	survive	3.1	23	18.12	12	62	4.8	7.2	10.6	61.3	0.0395349	0.096	0.10303	0.184364
6.3	32	medium	hatched	normal	survive	3.4	23.24	16.88	12.34	62	3.9	4.4	4.9	22.7	0.0116279	0.02	0.015152	0.064727
5.7	32	medium	hatched	normal	survive	3.2	22.34	18.24	13.2	63	4.4	6.4	8.7	43.3	0.0285714	0.08	0.069697	0.125818
4.2	32	medium	hatched	normal	died	2.5	20.76	15.76	11.4	63
6.7	32	medium	died
6.5	32	medium	died
6	32	medium	died
5.4	32	medium	died
6.5	32	medium	died
6.7	32	medium	died
6	32	medium	died
6.5	32	medium	died
7.9	32	medium	died
5.8	32	medium	died
4.4	32	medium	died
5.4	32	medium	died
5.7	32	high	hatched	normal	survive	3.4	23.16	17.5	14.66	56	4.2	5.2	6.4	28.3	0.0163265	0.04	0.036364	0.079636
5.9	32	high	hatched	malformation	died	3.1	20.8	15.46	12.56	58
6.3	32	high	hatched	normal	survive	3.7	23.5	18.76	12.28	59	4.9	6.2	7.7	25.4	0.0375	0.052	0.045455	0.064364
5.8	32	high	hatched	normal	survive	3.3	23.6	17.46	12.7	60	5.9	8.9	13.8	67	0.0577778	0.12	0.148485	0.193455
5.7	32	high	hatched	normal	survive	3.3	21.62	17.44	12.1	61	4.9	6.8	7.6	27.7	0.0363636	0.076	0.024242	0.073091
6	32	high	hatched	normal	survive	3.9	24.08	18.9	13	61	3.8	4.4	5.1	21.4	-0.00227273	0.024	0.021212	0.059273
6.6	32	high	hatched	normal	survive	3.5	24	18.3	12	62	4.7	6.3	7.7	43.3	0.027907	0.064	0.042424	0.129455
4.9	32	high	hatched	normal	survive	2.6	21.72	17.66	12	63	3.1	4.2	5.9	33.3	0.0178571	0.044	0.051515	0.099636
7.3	32	high	died
5.8	32	high	died
5.1	32	high	died
7	32	high	died
5.4	32	high	died
7.4	32	high	died
5.2	32	high	died
5.8	32	high	died
5.6	32	high	died
5.6	32	high	died
5	32	high	died
5.7	32	high	died
5.8	32	high	died
4.5	32	high	died
6.5	32	high	died
4.8	35	low	died
4.6	35	low	died
6.4	35	low	died
5	35	low	died
5.5	35	low	died
5.7	35	low	died
6	35	low	died
4.5	35	low	died
5.8	35	low	died
5.5	35	low	died
5.9	35	low	died
7	35	low	died
6.4	35	low	died
6.6	35	low	died
6	35	low	died
7	35	low	died
5.7	35	low	died
6.5	35	low	died
5.6	35	low	died
6.6	35	low	died
6.4	35	low	died
6.4	35	low	died
5.5	35	low	died
5.6	35	medium	hatched	malformation	died
5.8	35	medium	died
5.5	35	medium	died
5.5	35	medium	died
6.5	35	medium	died
5.6	35	medium	died
6.2	35	medium	died
5.2	35	medium	died
6.2	35	medium	died
5.4	35	medium	died
5	35	medium	died
5.1	35	medium	died
6.3	35	medium	died
5.5	35	medium	died
4.8	35	medium	died
6.1	35	medium	died
5.4	35	medium	died
5.2	35	medium	died
4.7	35	medium	died
7.1	35	medium	died
5.8	35	medium	died
7.2	35	medium	died
6.3	35	medium	died
7.5	35	medium	died
5.5	35	high	hatched	malformation	died
6.3	35	high	hatched	malformation	died
6.1	35	high	hatched	malformation	died
7	35	high	died
6.9	35	high	died
6.6	35	high	died
5.2	35	high	died
6.9	35	high	died
6.2	35	high	died
5.4	35	high	died
7.8	35	high	died
4.5	35	high	died
5.2	35	high	died
4.8	35	high	died
7.2	35	high	died
5.8	35	high	died
5.1	35	high	died
5	35	high	died
5.7	35	high	died
5.5	35	high	died
